# Supplementary material
Source: Royal Society of Chemistry journal article supplement (doi:10.1039/d6ay00498a)

A

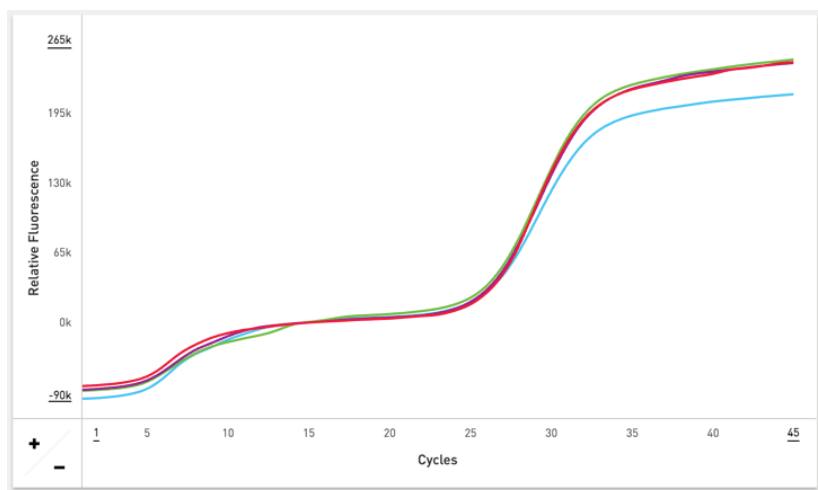

B

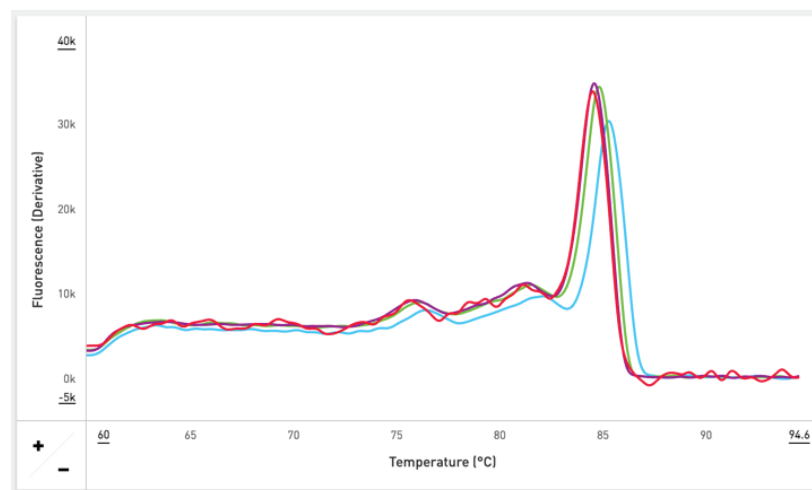

### SMP Absorbance

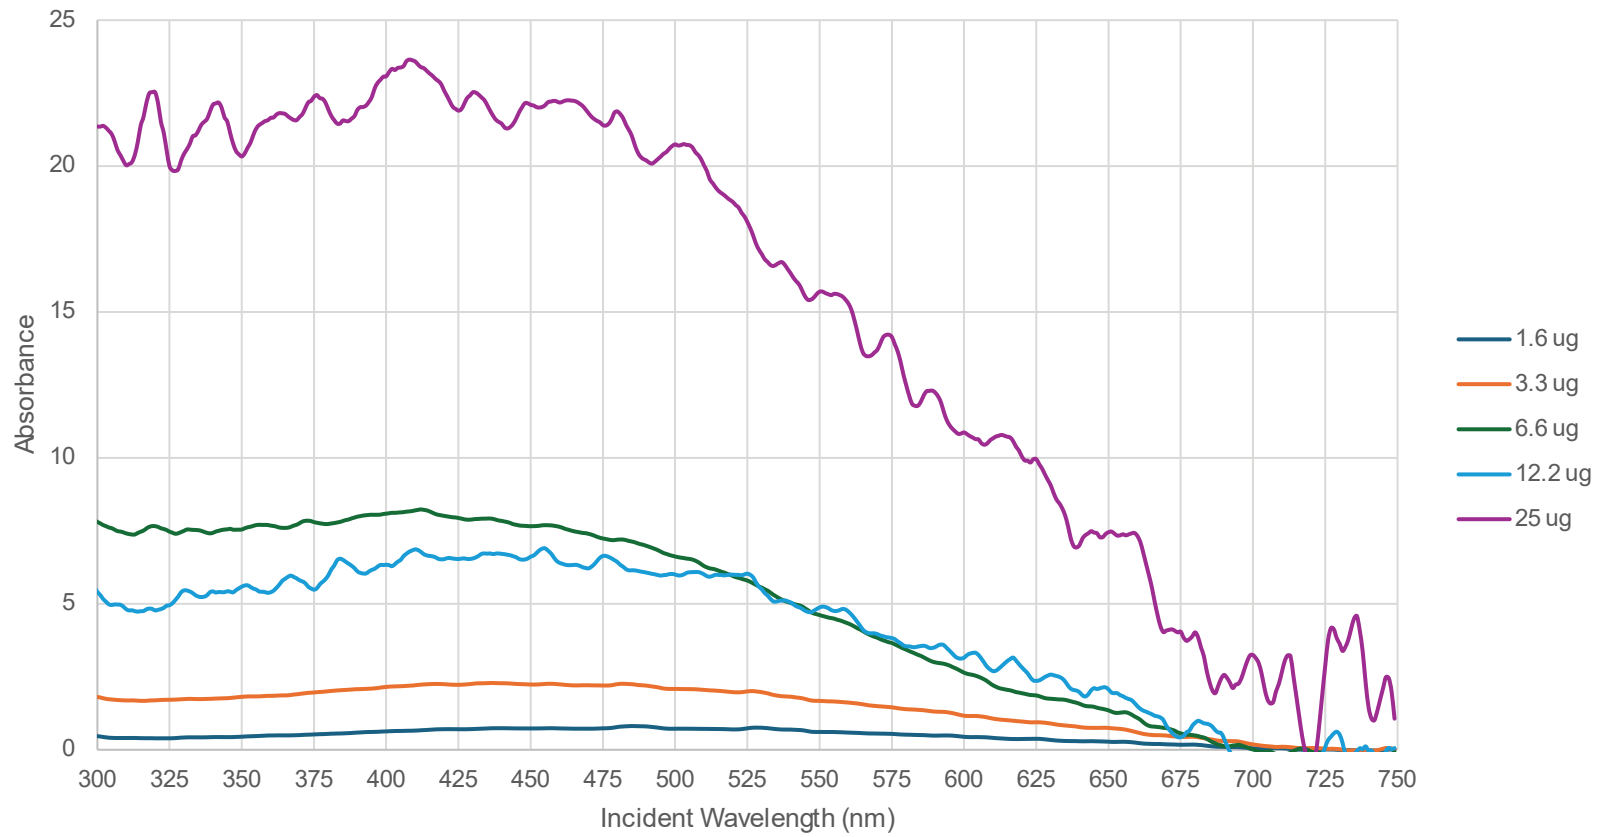

Supplement: d6ay00498a1.pdf [file d6ay00498a1.pdf]
